# Supplementary material
Source: PubMed Central journal article supplement (PMC8165727)
Supplement: ajnmmi0011-0143-f6.pdf [file ajnmmi0011-0143-f6.pdf]

## Quantitative <sup>11</sup>C-erlotinib PET

**Table S1.** Endpoints calculated from non-linear fitting of TACs to the 1T-3k, 2T-5k, and SRTM models. Parameters estimated with a standard error greater than 10 were highlighted in yellow (these endpoints were excluded from review in the paper due to the poor fit to the model)

| Subject            | Cluster | 1T-3k    |                      | 2T-5k    |                      | SRTM           |          |
|--------------------|---------|----------|----------------------|----------|----------------------|----------------|----------|
|                    |         | VT       | SE (V <sub>T</sub> ) | VT       | SE (V <sub>T</sub> ) | BP             | SE (BP)  |
| 1                  | 1       | 0.75     | 0.02                 | 1.00E+03 | 3.62E+06             | 1.39           | 0.09     |
| 2                  | 1       | 2.39     | 0.77                 | 1.43E+05 | 8.55E+08             | 3.50           | 0.39     |
|                    | 2       | 3.08     | 1.52                 | 1.56E+04 | 1.62E+09             | 4.31           | 0.25     |
|                    | 3       | 2.74     | 0.97                 | 1.49E+05 | 9.15E+08             | 3.45           | 0.35     |
|                    | 4       | 3.78E+02 | 5.30E+04             | 1.54E+05 | 2.89E+09             | 2.93           | 0.27     |
|                    | 5       | 3.15     | 1.30                 | 20.14    | 1.16E+02             | 3.93           | 0.20     |
| 3                  | 1       | 0.96     | 1.71                 | 0.97     | 7.73E+08             | 0.76           | 0.29     |
| 4                  | 1       | 7.26     | 41.87                | 6.64     | 1.05E+02             | 1.55E+04       | 1.54E+09 |
|                    | 2       | 1.12     | 0.13                 | 1.50     | 10.69                | 1.03           | 0.37     |
| 5                  | 1       | 0.66     | 0.03                 | 7.49E+03 | 1.49E+09             | 0.46           | 0.02     |
|                    | 2       | 0.54     | 0.07                 | 0.95     | 0.37                 | 0.35           | 0.06     |
| 6                  | 1       | 0.38     | 0.33                 | 1.23     | 9.29                 | 0.68           | 0.09     |
|                    | 2       | 0.52     | 0.08                 | 1.02     | 0.96                 | 0.85           | 0.09     |
|                    | 3       | 0.58     | 0.18                 | 1.33     | 0.47                 | 0.66           | 0.07     |
|                    | 4       | 0.97     | 0.14                 | 1.55     | 1.07                 | 1.01           | 0.09     |
|                    | 5       | 0.64     | 0.08                 | 1.04     | 0.10                 | 0.99           | 0.06     |
|                    | 6       | 0.47     | 0.12                 | 1.15     | 0.42                 | 0.83           | 0.11     |
|                    | 7       | 0.80     | 0.10                 | 1.32     | 0.13                 | 1.02           | 0.04     |
| 7                  | 1       | 0.80     | 28.64                | 3.02     | 8.59E+13             | non-convergent |          |
| 8                  | 1       | 0.75     | 0.06                 | 1.67E+04 | 1.79E+08             | 2.89E+04       | 9.23E+08 |
| 9                  | 1       | 0.89     | 0.10                 | 1.83     | 0.58                 | 2.15           | 0.14     |
| 10                 | 1       | 1.24     | 0.40                 | 1.24     | 1.00E+09             | 2.41           | 0.47     |
|                    | 2       | 1.13     | 0.11                 | 2.12E+03 | 3.77E+08             | 2.49           | 0.08     |
|                    | 3       | 2.58E+05 | 2.27E+09             | 1.61E+05 | 4.99E+08             | 10.36          | 8.27E+10 |
|                    | 4       | 1.60     | 1.03                 | 17.57    | 7.51E+02             | 1.96           | 0.38     |
|                    | 5       | 1.31E+05 | 9.95E+08             | 1.82E+05 | 2.30E+09             | 1.62           | 0.14     |
|                    | 6       | 2.83E+04 | 1.04E+09             | 1.76E+06 | 1.23E+11             | 33.35          | 1.20E+08 |
| SE Cutoff: 10      |         |          |                      |          |                      |                |          |
| ROIs Under Cutoff: |         | 21       |                      | 9        |                      | 22             |          |
